# Supplementary material
Source: PubMed Central journal article supplement (PMC9188999)
Supplement: mmc1.pdf [file mmc1.pdf]

**Supplemental information**

**COVID-19 vaccination elicits an evolving,  
cross-reactive antibody response to epitopes  
conserved with endemic coronavirus spike proteins**

**Evan A. Elko, Georgia A. Nelson, Heather L. Mead, Erin J. Kelley, Sophia T. Carvalho, Nathan G. Sarbo, Caroline E. Harms, Virginia Le Verche, Angelo A. Cardoso, Jennifer L. Ely, Annalee S. Boyle, Alejandra Piña, Sierra N. Henson, Fatima Rahee, Paul S. Keim, Kimberly R. Celona, Jinhee Yi, Erik W. Settles, Daniela A. Bota, George C. Yu, Sheldon R. Morris, John A. Zaia, Jason T. Ladner, and John A. Altin**

**Supplemental Information**

**A**

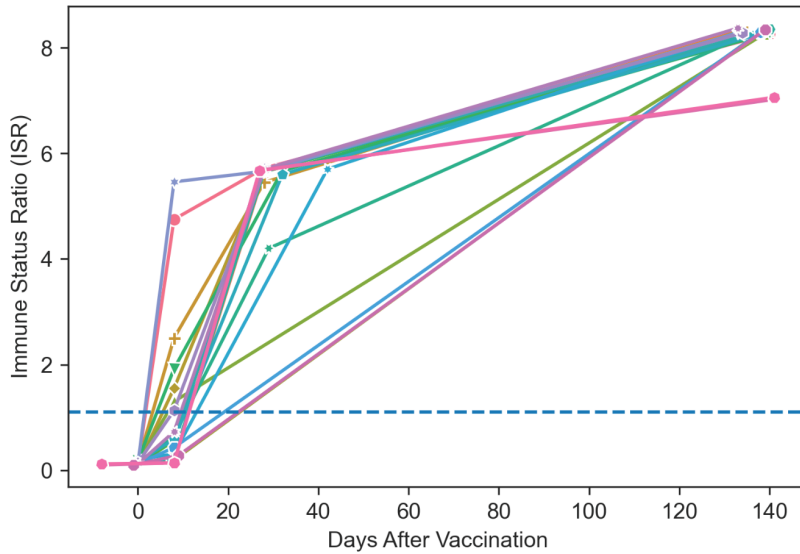

**B**

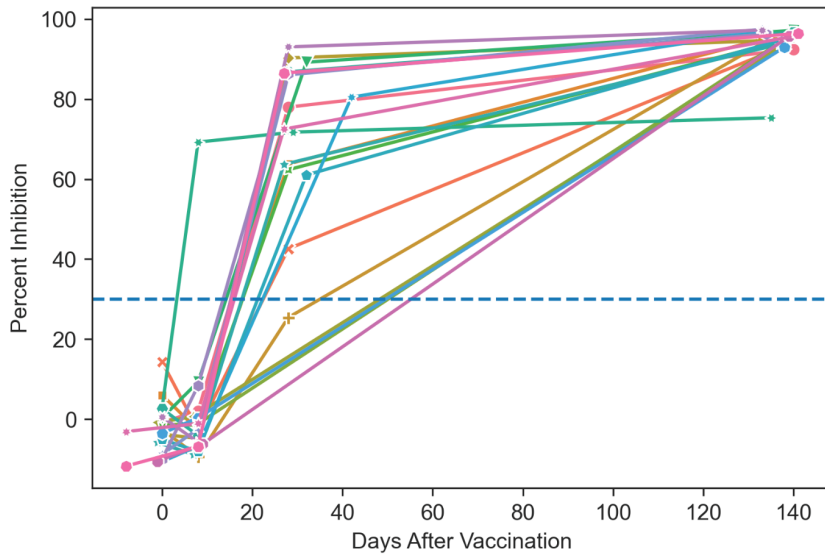

**Supplemental Figure 1: Vaccine-induced increases in SARS-CoV-2 Spike-binding and RBD-inhibiting antibodies over time across the cohort.** (Related to Figure 1). **A.** Magnitude of plasma IgG binding to SARS-CoV-2 Spike over time in vaccinated patients, measured by ELISA (InBios). Positivity threshold (ISR = 1.1) is indicated as dashed blue line. **B.** Magnitude of plasma inhibition of SARS-CoV-2 RBD binding to ACE2 over time in vaccinated patients, measured by competition ELISA (GenScript). Positivity threshold (30% inhibition) is indicated as dashed blue line.

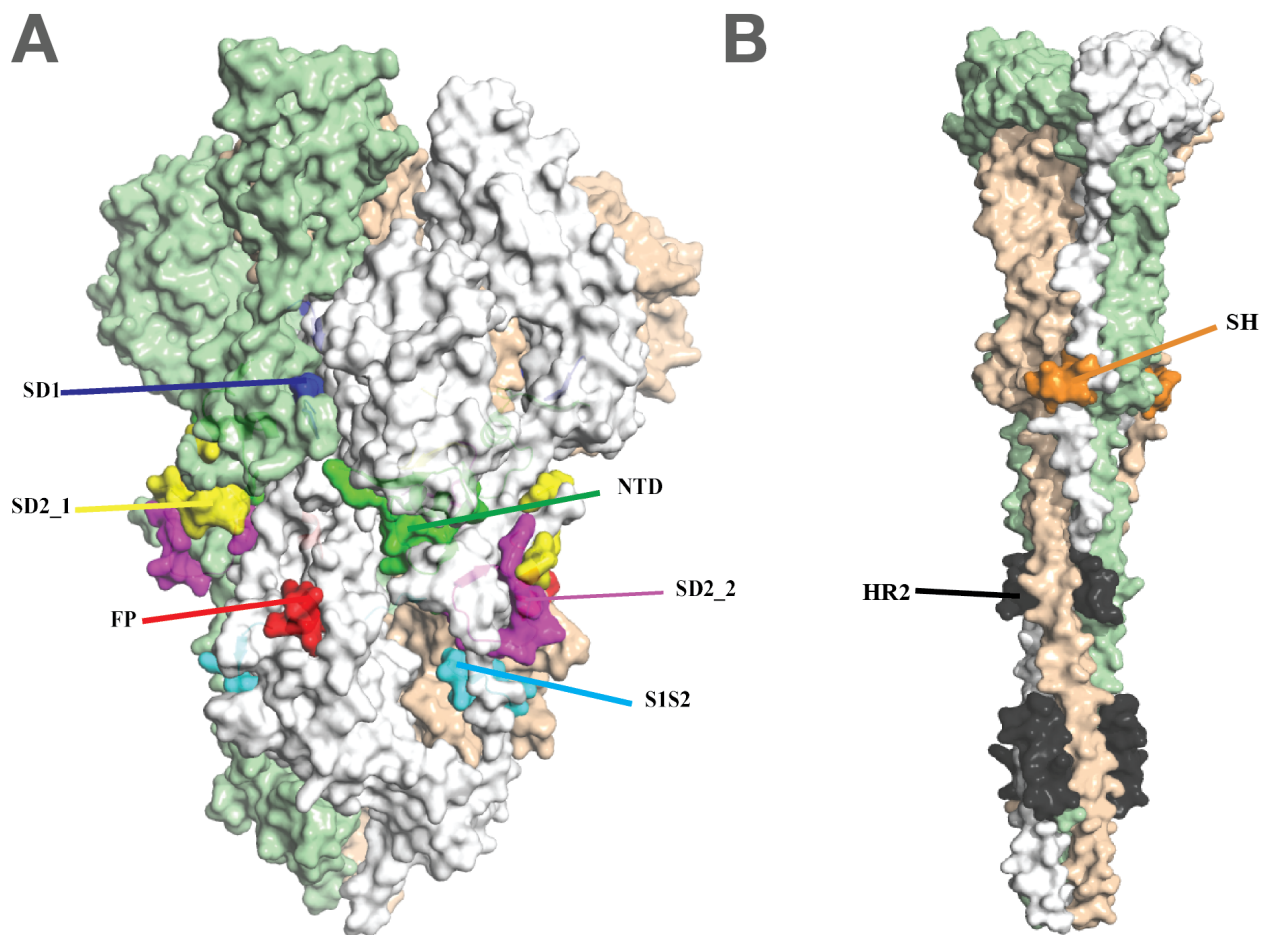

**Supplemental Figure 2: 3D model of SARS-CoV-2 Spike protein in the pre- and post-fusion conformations highlighting epitope regions recognized by the vaccine response.** (Related to Figure 1.) A. Pre-fusion 3D model of SARS-CoV-2 Spike protein trimer (PDB:6VYB) with the epitopes identified in Figure 1 highlighted. Dark blue=SD1, yellow=SD2\_1, red=FP, green=NTD, purple=SD2\_2, aqua=SIS2. B. Post-fusion 3D model of SARS-CoV-2 Spike S2 trimer (PDB:6XRA) with the relevant epitopes identified in Figure 1 highlighted. Orange=SH, Black=HR2. HR2 appears as two segments as there is an unstructured region that is not well defined in the middle of the epitope. The FP epitope is in a disordered loop at the bottom of the structure, and therefore is not shown here. Epitopes were rendered on space-filling models created using The PyMOL Molecular Graphics System, Version 2.5.2 Schrödinger, LLC.

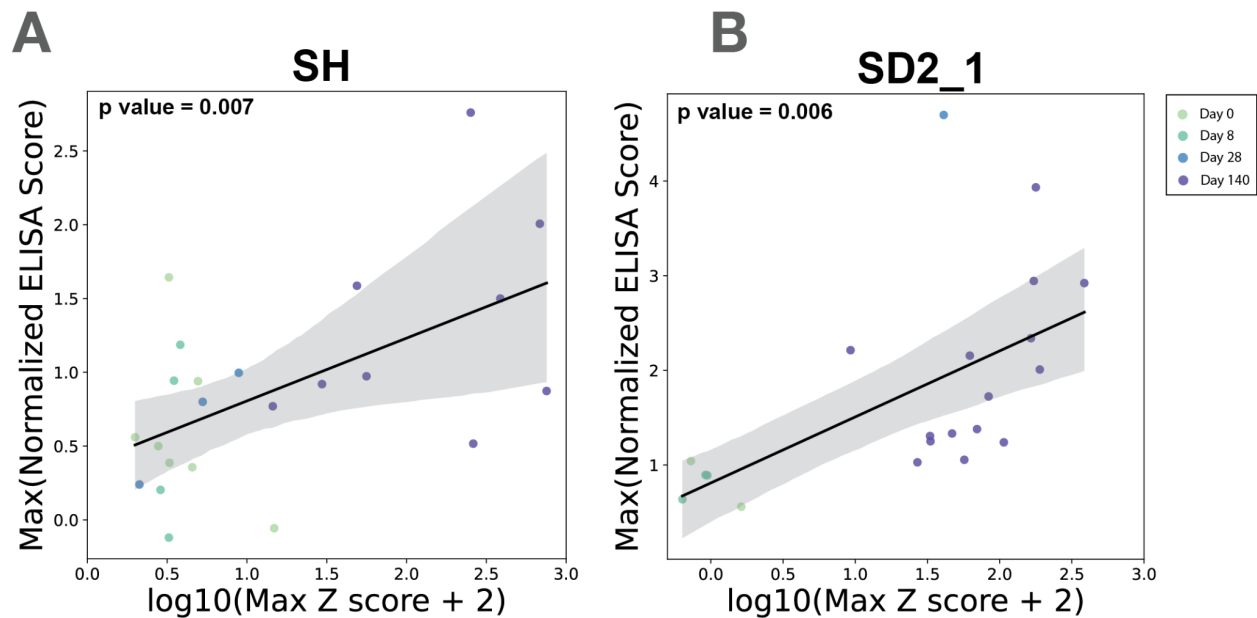

**Supplemental Figure 3: Correlated signal between PepSeq and peptide ELISA analysis of the same peptides.** (Related to Figure 1.) Subsets of samples from the vaccinated cohort were selected across a range of PepSeq Z scores (x-axis) for a cross-reactive epitope (A: SH, n=22) and a non-cross-reactive epitope (B: SD2\_1, n=20) and assayed by peptide ELISAs using the corresponding chemically-synthesized peptides (y-axis). Datapoints are colored by timepoint post-vaccine and show a significant correlation for each epitope (p values generated using Pearson correlation test are shown in upper-left corners).

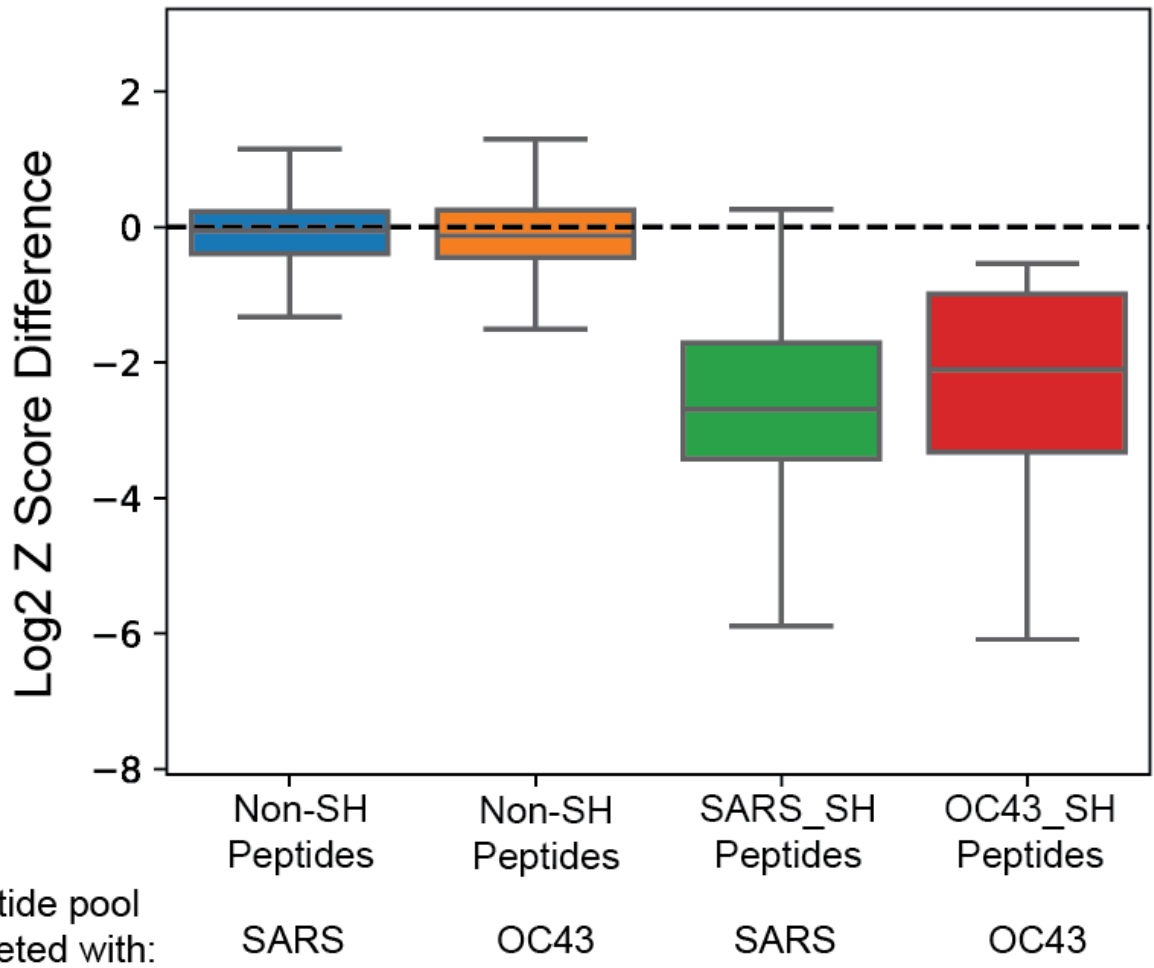

**Supplemental Figure 4: Specificity of the PepSeq assay relative to chemically-synthesized peptides.** (Related to Figures 1 and 3.) 25 samples were assayed by PepSeq, with or without prior epitope-specific antibody depletion using beads bearing chemically-synthesized SH peptides of either the SARS or OC43 sequences. For each of the 4 columns/bars, the difference in PepSeq signal between the non-depleted and depleted samples (y-axis) is shown for all peptides in the indicated category that have non-depleted Z-scores  $\geq 10$ . Median PepSeq signal reductions of 2-3 log<sub>2</sub> units are observed for peptides matching the depleted sequences (2 right columns), whereas no such reductions are seen for the non-depleted peptides (2 left columns).

**Supplemental Table 1 Vaccinated Participant Biodata**

| Sex    | Age range | Period between doses (days) | Collection timepoints (days from first vaccine dose) |        |         |          |
|--------|-----------|-----------------------------|------------------------------------------------------|--------|---------|----------|
|        |           |                             | ~Day 0                                               | ~Day 8 | ~Day 28 | ~Day 140 |
| Female | 30-39     | 28                          | 0                                                    | 8      | 28      | 140      |
| Female | 30-39     | 28                          | 0                                                    | 8      | 28      | 138      |
| Male   | 30-39     | 28                          | 0                                                    | 8      | 28      | 133      |
| Male   | 40-49     | 28                          | 0                                                    | 8      | 28      | 135      |
| Female | 30-39     | 28                          | 0                                                    | 8      | 28      | 138      |
| Male   | 50-59     | 32                          | -1                                                   | 7      | 28      | 138      |
| Female | 18-29     | 28                          | 0                                                    | 8      | NC      | 139      |
| Male   | 40-49     | 28                          | 0                                                    | 8      | 28      | 140      |
| Male   | 18-29     | 32                          | 0                                                    | 8      | 32      | 140      |
| Male   | 60+       | 29                          | 0                                                    | 8      | 29      | 135      |
| Female | 18-29     | 28                          | 0                                                    | 8      | 28      | 140      |
| Female | 18-29     | 27                          | -1                                                   | 7      | 27      | 137      |
| Male   | 18-29     | 32                          | 0                                                    | 8      | 32      | 138      |
| Female | 40-49     | 45                          | 0                                                    | 8      | 42      | 134      |
| Male   | 18-29     | 28                          | 0                                                    | 8      | NC      | 138      |
| Female | 30-39     | 28                          | 0                                                    | 8      | 28      | 133      |
| Female | 50-59     | 28                          | -2                                                   | 8      | 28      | 134      |
| Female | 30-39     | 28                          | 0                                                    | 8      | 28      | 133      |
| Female | 60+       | 28                          | -1                                                   | 10     | 25      | NC       |
| Female | 60+       | 28                          | -8                                                   | 8      | 27      | 141      |
| Male   | 60+       | 28                          | -8                                                   | 8      | 27      | 141      |

NC= Not Collected

All timepoints are expressed in days relative to the day on which the first vaccine dose occurred. Day 28 collection occurred before the second vaccine dose.

**Supplemental Table 2 Convalescent Participant Biodata**

| Sex    | Age range | Collection timepoint<br>(days from positive<br>diagnosis) |
|--------|-----------|-----------------------------------------------------------|
| Male   | 50-59     | 38                                                        |
| Female | 30-39     | 121                                                       |
| Female | 40-49     | 85                                                        |
| Female | 40-49     | 68                                                        |
| Female | 30-39     | 69                                                        |
| Female | 30-39     | 53                                                        |
| Female | 50-59     | 94                                                        |
| Female | 18-29     | 29                                                        |
| Female | 40-49     | 127                                                       |
| Female | 30-39     | 81                                                        |
| Female | 40-49     | 78                                                        |
| Male   | 18-29     | 44                                                        |
| Female | 60+       | 135                                                       |
| Female | 50-59     | 118                                                       |
| Male   | 30-39     | 59                                                        |
| Female | 18-29     | 50                                                        |
| Female | 30-39     | 40                                                        |
| Female | 40-49     | 66                                                        |
| Female | 30-39     | 119                                                       |
| Female | 18-29     | 70                                                        |
| Female | 18-29     | 99                                                        |
| Male   | 40-49     | 67                                                        |
| Female | 50-59     | 74                                                        |
| Female | 18-29     | 79                                                        |
| Female | 50-59     | 111                                                       |
| Male   | 30-39     | 49                                                        |
| Female | 30-39     | 92                                                        |
| Male   | 60+       | 142                                                       |
| Male   | 40-49     | 69                                                        |
| Female | 50-59     | 50                                                        |
| Male   | 30-39     | 65                                                        |
| Female | 50-59     | 20                                                        |

|        |       |    |
|--------|-------|----|
| Female | 30-39 | 34 |
| Male   | 50-59 | 20 |
| Female | 60+   | 30 |
| Female | 60+   | 28 |
| Female | 18-29 | 24 |
| Female | 50-59 | 17 |
| Female | 30-39 | 28 |
| Female | 50-59 | 25 |
| Female | 50-59 | 25 |
| Female | 18-29 | 30 |
| Female | 30-39 | 24 |
| Female | 50-59 | 21 |
| Male   | 30-39 | 31 |

Positive diagnosis determined by PCR. Collection timepoint is expressed in days relative to the day on which the patient tested PCR positive for COVID-19.

**Supplemental Table 3 PepSeq Coronavirus Peptides**

| Epitope | Target Virus                           | Assay Peptides                                                                                                 | Core                               | Core Coordinates in SARS-CoV-2 Spike |
|---------|----------------------------------------|----------------------------------------------------------------------------------------------------------------|------------------------------------|--------------------------------------|
| NTD     | SARS-CoV-2                             | TITDAVDCALDPLSEKCTLKSF<br>VEKGIY                                                                               | TITDAVDCALDPLSEKCTLKSF<br>TVEKGIY  | 284-313                              |
| SD1     | SARS-CoV-2<br>SARS-CoV-2               | GVLTESNKKFLPFQQFGRDIADT<br>TDAVRDP<br>FLPFQQFGRDIADTTDAVRDPQT<br>LEILDIT                                       | QQFGR                              | 563-567                              |
| SD2_1   | SARS-CoV-2                             | EVPVAIHADQLTPTWRVYSTGSN<br>VFQTRAG                                                                             | EVPVAIHADQLTPTWRVYSTGSN<br>VFQTRAG | 619-648                              |
| SD2_2   | SARS-CoV-2<br>SARS-CoV-2<br>SARS-CoV-2 | GSNVFQTRAGCLIGAEHVNNSY<br>ECDIPIGA<br>AGCLIGAEHVNNSYECDIPIGAGI<br>CASYQT<br>IGAEHVNNSYECDIPIGAGICASY<br>QTQTNS | IGAEHVNNSYECDIPIGA                 | 651-668                              |
| S1S2    | SARS-CoV-2<br>SARS-CoV-2<br>SARS-CoV-2 | NRALSGIAVEQDKNTQEVFAQV<br>KQIYKTPA<br>QDKNTQEVFAQVKQIYKTPPIKD<br>FGGFNFS<br>QLNRALTGIAVEQDKNTQEVFAQ<br>VKQIYKT | VKQIYKT                            | 785-791                              |



|    |                                                                                  |                                                                                                                                                                                                                                                                                                                                                |               |           |
|----|----------------------------------------------------------------------------------|------------------------------------------------------------------------------------------------------------------------------------------------------------------------------------------------------------------------------------------------------------------------------------------------------------------------------------------------|---------------|-----------|
|    | SARS-CoV-2<br>SARS-CoV-2                                                         | VKQIYKTPPIKDFGGFNFSQILPD<br>PSKPSK<br>NTQEVFAQVKQIYKTPPIKDFGG<br>FNFSQIL                                                                                                                                                                                                                                                                       |               |           |
| FP | SARS-CoV-2<br>SARS-CoV-2<br>SARS-CoV-2<br>SARS-CoV-2<br>SARS-CoV-2<br>SARS-CoV-2 | GSDCNTVSSRSAIEDLLFNKVR<br>SDVGFVE<br>NFSQILPDPSKPSKRSFIEDLLFNK<br>VTLAD<br>SKPSKRSFIEDLLFNKVTLADAG<br>FIKQYGD<br>IEDLLFNKVTLADAGFIKQYGDC<br>LGDIAAR<br>PDPSKPSKRSFIEDLLFNKVTLAD<br>AGFIKQ<br>FGGFNFSQILPDPSKPSKRSFIEDL<br>LFNKV                                                                                                                | EDLLFN        | 819-824   |
|    | OC43<br>229E<br>229E<br>229E<br>HKU1<br>HKU1<br>HKU1<br>OC43<br>OC43             | DINFSPVLGCLGSDCNKASTRSAI<br>EDLLFD<br>YNLSSVIPSLPRSGSRVAGRSAIE<br>DILFSK<br>RVAGRSAIEDILFSKVVTSGGLTV<br>DADYKK<br>PSLPTSGSRVAGRSAIEDILFSKLV<br>TSGLG<br>GPHCGSSSRSFEDLLFDKVKLS<br>DVGVEA<br>FKSLVGCLGPHCGSSSRSFEDLL<br>FDKVKL<br>FEDLLFDKVKLSDVGFVEAYNN<br>CTGGSEIR<br>IEDLLFDKVKLSDVGFVEAYNNC<br>TGGAEIR<br>CLGSECSKASSRSAIEDLLFDKV<br>KLSVGF | EDLLFD,EDILFS |           |
| SH | SARS-CoV-2<br>SARS-CoV-2<br>SARS-CoV-2<br>SARS-CoV-2<br>SARS-CoV-2<br>SARS-CoV-2 | FKEELDKYFKNHTSPDVDLGD<br>GINASV<br>SFKEELDKYFKNHTSPDVDLGD<br>GINASV<br>TVYDPLQPELDSFKEELDKYFKN<br>HTSPDVD<br>GIVNNTVYDPLQPELESFKEELD<br>KYFKNHT<br>DVGIVNNTVYDPLQPELDSFK<br>EELDKYF<br>IVNNTVYDPLQPELDSFKEELDK<br>YFKNHTS                                                                                                                      | EELDKY        | 1150-1155 |
|    | OC43<br>OC43<br>OC43<br>OC43<br>OC43                                             | APDVMLNISTPKLPDFKEELDQW<br>FKNQTSV<br>VNYTKAPYVMLNTSIPNLPDFKE<br>ELDQWFK<br>LNISTPNLHDFKEELDQWFKNQ                                                                                                                                                                                                                                             | EELDQW        |           |

|     |                      |                                                                                                                                                                                                         |                                    |           |
|-----|----------------------|---------------------------------------------------------------------------------------------------------------------------------------------------------------------------------------------------------|------------------------------------|-----------|
|     | OC43<br>OC43<br>OC43 | LVAPDLS<br>SIPNLPDFREELDQWFKNQTSVA<br>PDLSEFDY<br>ISTPNLPDFKEELDQWFKNHTSV<br>APNLSLD<br>AVNYTKAPYVMLNTSTPNLPDF<br>REELDQWF<br>PNLPDFKEELDQWFKNQTSVAPD<br>LSLDYIN<br>TKAPYVMLNTSIPNLPDFKEELD<br>QWFKNQTS |                                    |           |
| HR2 | SARS-CoV-2           | GDISGINASVVNIQKEIDRLNEVA<br>KNLNES                                                                                                                                                                      | GDISGINASVVNIQKEIDRLNEVA<br>KNLNES | 1167-1196 |
